# Supplementary material
Source: PubMed Central journal article supplement (PMC7405135)
Supplement: CMDC-15-1921-s001.pdf [file CMDC-15-1921-s001.pdf]

# ChemMedChem

Supporting Information

## **Targeting SARS-CoV-2 RBD Interface: a Supervised Computational Data-Driven Approach to Identify Potential Modulators**

Maria Rita Gulotta<sup>+,\*</sup> Jessica Lombino<sup>+</sup>, Ugo Perricone,<sup>\*</sup> Giada De Simone, Nedra Mekni, Maria De Rosa, Patrizia Diana, and Alessandro Padova

## Author Contributions

M.G. Conceptualization:Lead; Data curation:Equal; Formal analysis:Equal; Investigation:Lead; Methodology:Lead; Project administration:Supporting; Visualization:Equal; Writing - Original Draft:Lead; Writing - Review & Editing:Equal

J.L. Conceptualization:Supporting; Data curation:Equal; Formal analysis:Supporting; Investigation:Equal; Visualization:Equal; Writing - Original Draft:Equal; Writing - Review & Editing:Equal

U.P. Conceptualization:Equal; Data curation:Equal; Formal analysis:Lead; Methodology:Supporting; Supervision:-Lead; Validation:Supporting; Visualization:Supporting; Writing - Review & Editing:Lead

G.D. Data curation:Supporting; Validation:Supporting; Writing - Review & Editing:Supporting

N.M. Data curation:Supporting; Formal analysis:Supporting; Visualization:Supporting; Writing - Review & Editing:-Supporting

M.D. Conceptualization:Supporting; Formal analysis:Supporting; Visualization:Supporting; Writing - Review & Editing:Supporting

P.D. Visualization:Supporting; Writing - Review & Editing:Supporting

A.P. Conceptualization:Lead; Formal analysis:Lead; Project administration:Lead; Supervision:Lead; Writing - Review & Editing:Lead

## SUPPORTING INFORMATION

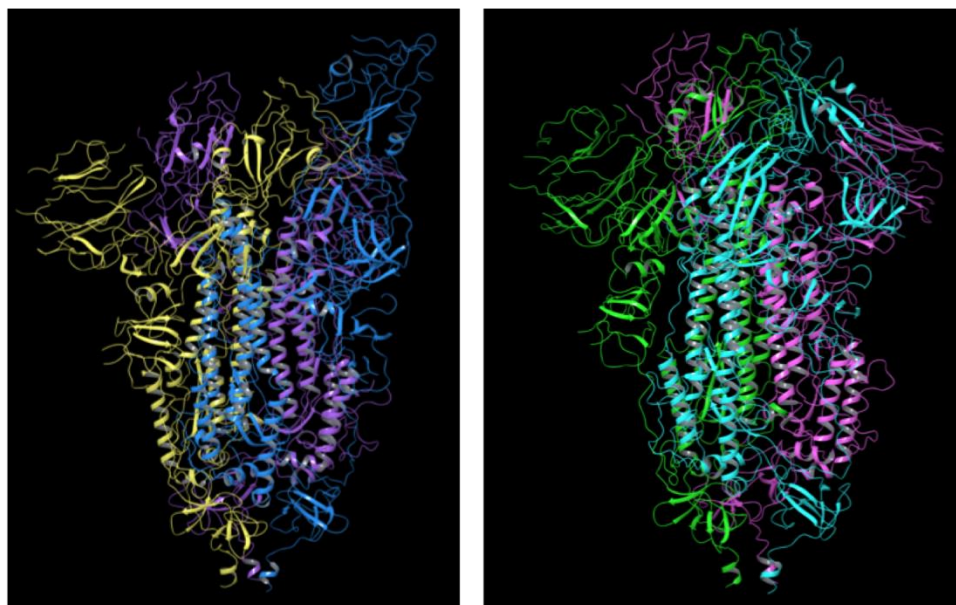

**Figure S1. Up state and down state of SARS-CoV-2 receptor-binding motif.** On the left, PDB 6VYB: Yellow, pink and blue chains in open conformations; on the right, PDB 6VXX: Green, violet and light blue chains in closed conformations.

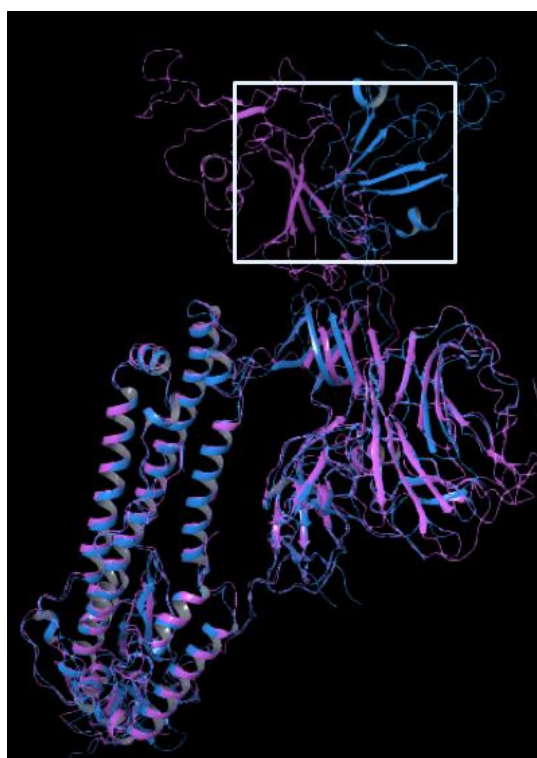

**Figure S2. SARS-CoV and SARS-CoV-2 RBDs superposition.** SARS-CoV-2 RBD in open state (blue structure – PDB 6VYB); SARS-CoV RBD in open state (pink structure – PDB 6ACD).

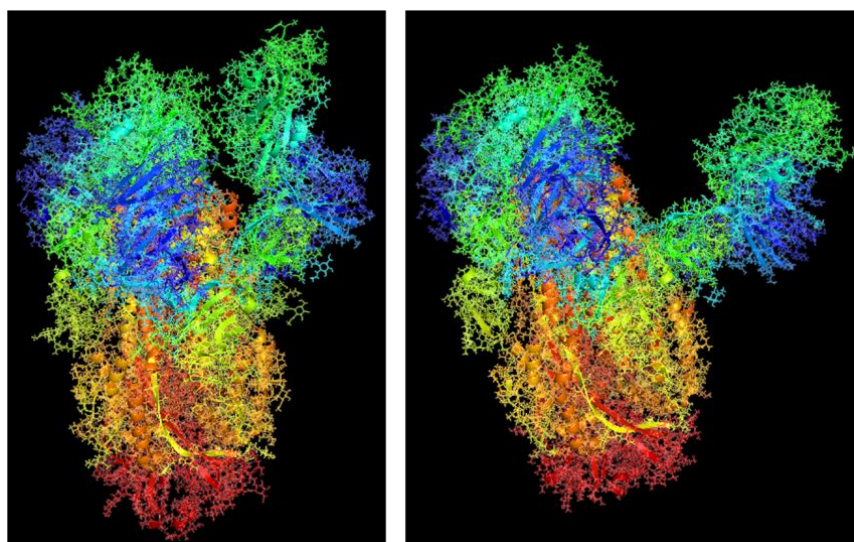

**Figure S3.** Frames of MD simulation performed using PDB X-ray crystal structure 6VYB. On the left, frame 0 showing the initial partially open state of RBD; on the right, frame 2003 presenting the open state of RBD.

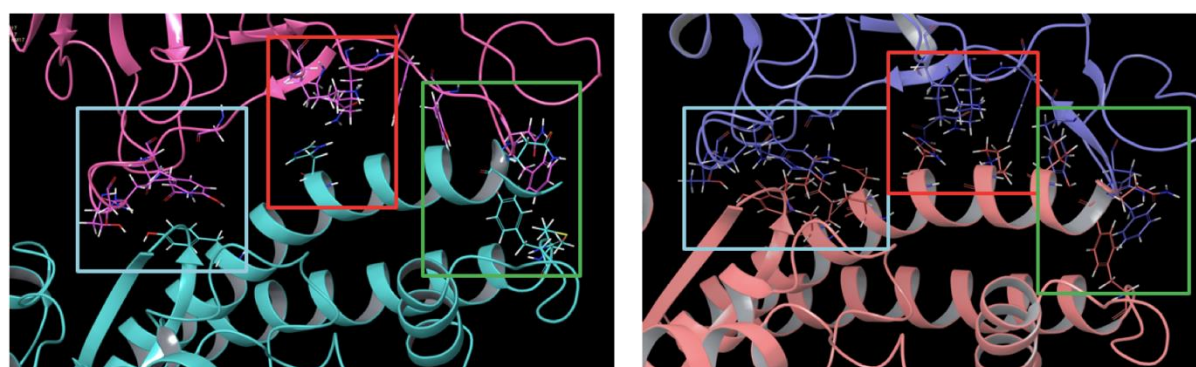

**Figure S4.** Hot spot residues at the three Spike RBD-ACE2 PD interactions regions. On the left, PDB ID 6M17, the dark pink chain is ACE2, while the light blue chain is S protein; on the right, the purple chain is ACE2, and the pink chain is S protein. In both pictures, the light blue square highlights the N-term, the red one the central region, and the green square indicates the C-term at ACE2-S protein interaction interface.

**Table S1.** Comparison between RBD residues of SARS-CoV and SARS-CoV-2 at the interface with ACE2. On the left, conserved amino acids between the two proteins; in the middle, residues with similar biochemical or physical properties; on the right, residues marked with \* are involved in the interaction with ACE2.

| CONSERVED AMINO ACIDS |            | SIMILAR AMINO ACIDS |            | DIFFERENT AMINO ACIDS |            |
|-----------------------|------------|---------------------|------------|-----------------------|------------|
| SARS-CoV              | SARS-CoV-2 | SARS-CoV            | SARS-CoV-2 | SARS-CoV              | SARS-CoV-2 |
| Tyr436*               | Tyr449     | Leu443*             | Phe456     | Val404                | Lys417     |
| Tyr440*               | Tyr453     | Leu472*             | Phe486     | Thr433                | Gly446     |
| Asn473*               | Asn487     | Asn479*             | Gln493     | Pro462*               | Ala475     |
| Tyr475*               | Tyr489     | Thr487*             | Asn501     | Tyr484*               | Gln498     |
| Tyr481                | Tyr495     | Tyr442*             | Leu455     |                       |            |
| Gly482*               | Gly496     |                     |            |                       |            |
| Thr486*               | Thr500     |                     |            |                       |            |
| Gly488*               | Gly502     |                     |            |                       |            |
| Tyr491*               | Tyr505     |                     |            |                       |            |

**Table S2. Computational alanine scanning results including only ACE2 and SARS-CoV-2 S protein interface residues with  $\Delta\Delta G_{\text{affinity}}$  values over 3 kcal/mol.** The top part of the table shows hot spots residues for PDB 6M17 divided into three regions, N-terminal, central and C-terminal portions. The second part of the table shows hot spot amino acids for PDB 6M0J according to the three regions. The last row of the table provides the total number of hot spots per region considering both PDB structures.

| PDB ID: 6M17         |                                    |        |                                    |                     |                                    |        |                                    |                     |                                    |        |                                    |
|----------------------|------------------------------------|--------|------------------------------------|---------------------|------------------------------------|--------|------------------------------------|---------------------|------------------------------------|--------|------------------------------------|
| N-TERM               |                                    |        |                                    | MIDDLE              |                                    |        |                                    | C-TERM              |                                    |        |                                    |
| ACE2                 | $\Delta\Delta G_{\text{affinity}}$ | Spike  | $\Delta\Delta G_{\text{affinity}}$ | ACE2                | $\Delta\Delta G_{\text{affinity}}$ | Spike  | $\Delta\Delta G_{\text{affinity}}$ | ACE2                | $\Delta\Delta G_{\text{affinity}}$ | Spike  | $\Delta\Delta G_{\text{affinity}}$ |
| Tyr41                | 12.82                              | Thr500 | 7.65                               | His34               | 8.91                               | Phe456 | 4.80                               | Tyr83               | 9.28                               | Phe486 | 11.93                              |
|                      |                                    | Gly496 | 5.54                               |                     |                                    | Leu455 | 4.26                               | Gln24               | 7.09                               | Tyr489 | 7.92                               |
|                      |                                    | Asn501 | 5.29                               |                     |                                    | Gln493 | 4.23                               | Met82               | 5.19                               | Asn487 | 3.45                               |
|                      |                                    | Tyr505 | 3.88                               |                     |                                    | Lys417 | 3.83                               |                     |                                    |        |                                    |
|                      |                                    | Gly502 | 3.81                               |                     |                                    |        |                                    |                     |                                    |        |                                    |
|                      |                                    | Gln498 | 3.38                               |                     |                                    |        |                                    |                     |                                    |        |                                    |
| PDB ID: 6M0J         |                                    |        |                                    |                     |                                    |        |                                    |                     |                                    |        |                                    |
| N-TERM               |                                    |        |                                    | MIDDLE              |                                    |        |                                    | C-TERM              |                                    |        |                                    |
| ACE2                 | $\Delta\Delta G_{\text{affinity}}$ | Spike  | $\Delta\Delta G_{\text{affinity}}$ | ACE2                | $\Delta\Delta G_{\text{affinity}}$ | Spike  | $\Delta\Delta G_{\text{affinity}}$ | ACE2                | $\Delta\Delta G_{\text{affinity}}$ | Spike  | $\Delta\Delta G_{\text{affinity}}$ |
| Tyr41                | 15.18                              | Tyr505 | 9.51                               | Lys31               | 7.65                               | Lys417 | 10.44                              | Tyr83               | 8.86                               | Asn487 | 10.75                              |
| Gln42                | 7.70                               | Asn501 | 7.95                               | His34               | 4.18                               | Gln493 | 7.96                               | Gln24               | 7.67                               | Phe486 | 9.90                               |
| Lys353               | 7.03                               | Thr500 | 7.53                               |                     |                                    | Leu455 | 6.73                               | Thr27               | 5.97                               | Tyr489 | 6.46                               |
| Asp38                | 4.95                               | Gln498 | 6.75                               |                     |                                    | Phe456 | 6.42                               |                     |                                    |        |                                    |
| Glu37                | 4.35                               | Gly502 | 6.69                               |                     |                                    |        |                                    |                     |                                    |        |                                    |
|                      |                                    | Gly496 | 3.75                               |                     |                                    |        |                                    |                     |                                    |        |                                    |
| TOTAL HOT SPOTS = 11 |                                    |        |                                    | TOTAL HOT SPOTS = 6 |                                    |        |                                    | TOTAL HOT SPOTS = 7 |                                    |        |                                    |

**Table S3. RMSD plots of MD simulations.** On the left, RMSD plot of MD on PDB 6M17 is illustrated, where the system gets stable after about 30 ns of simulation; on the right, RMSD plot of MD on PDB 6M0J is depicted, where the system achieves a stationary shape at about 80 ns.

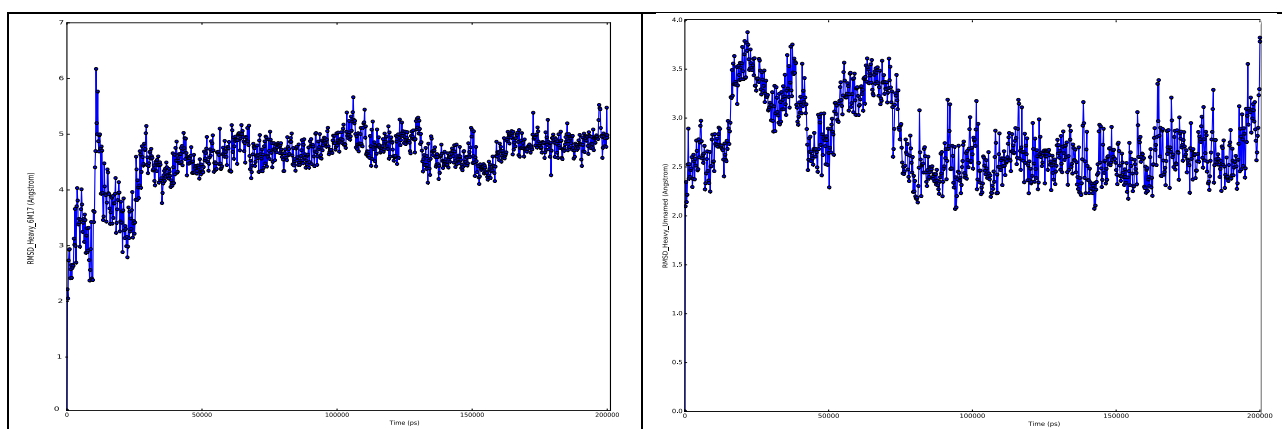

**Table S4. H-bond frequency occurrences during MD simulations of PDBs 6M17 and 6M0J.** Frequency vs simulation time plots are displayed for those hydrogen bond interactions retrieved from clustered MD frames; blue dots on the top depict one H-bond occurrences connected to the blue dots on the bottom representing no H-bond occurrences.

**PDB 6M17**

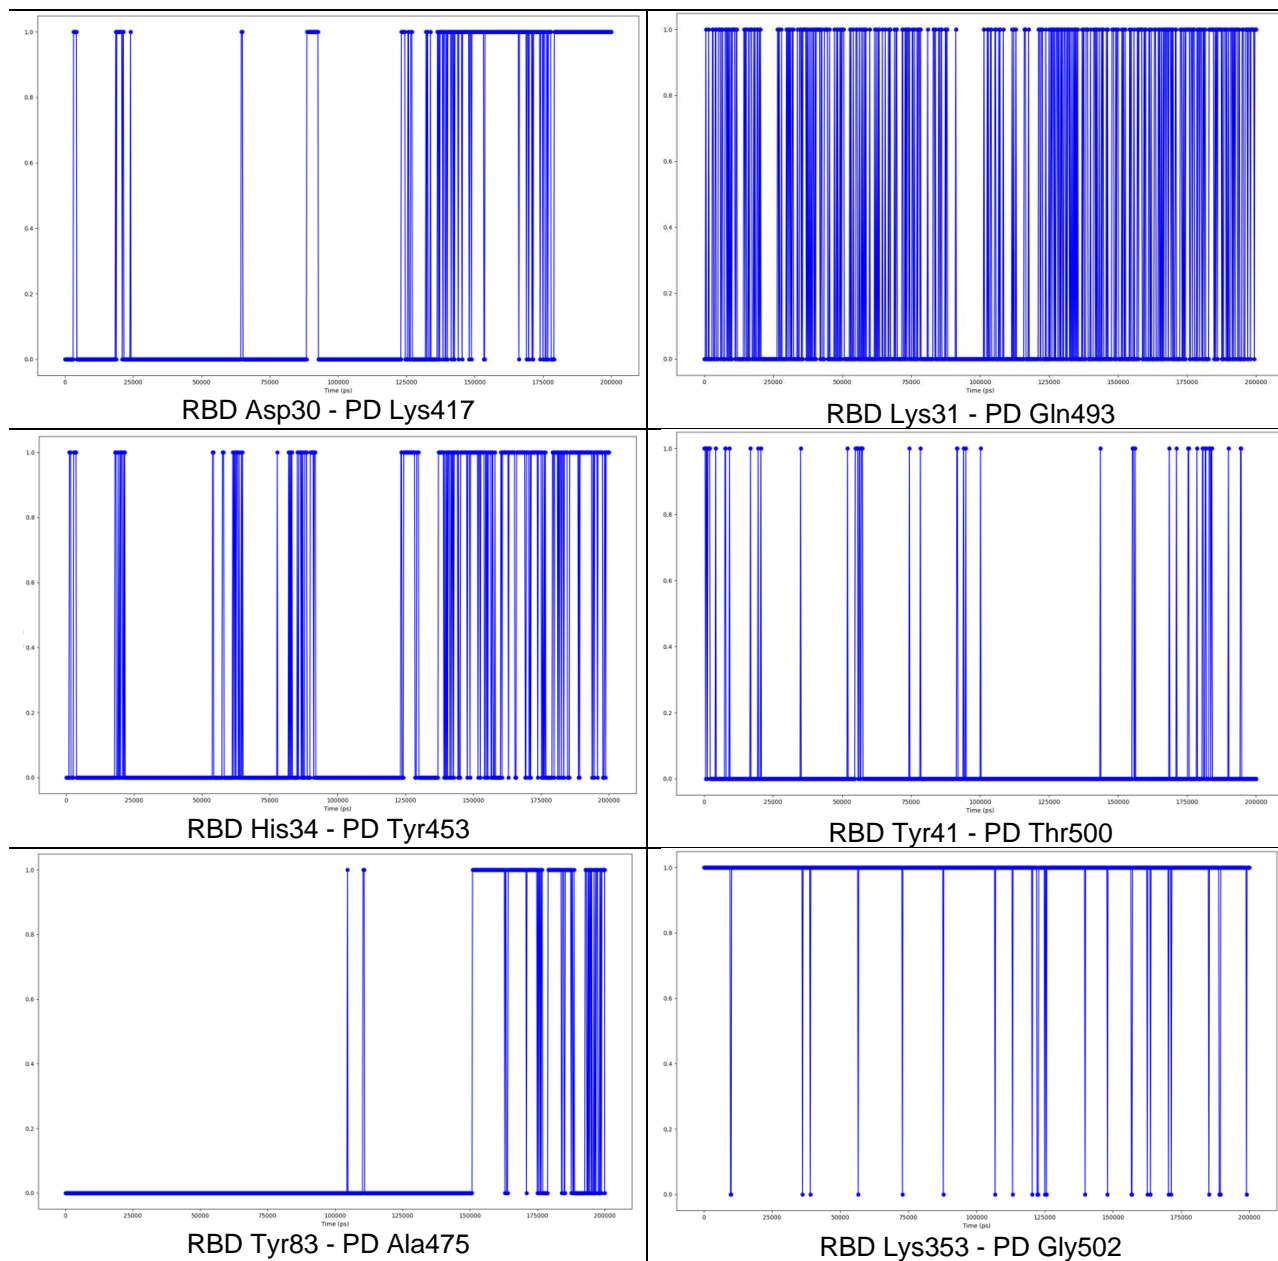

PDB 6M0J

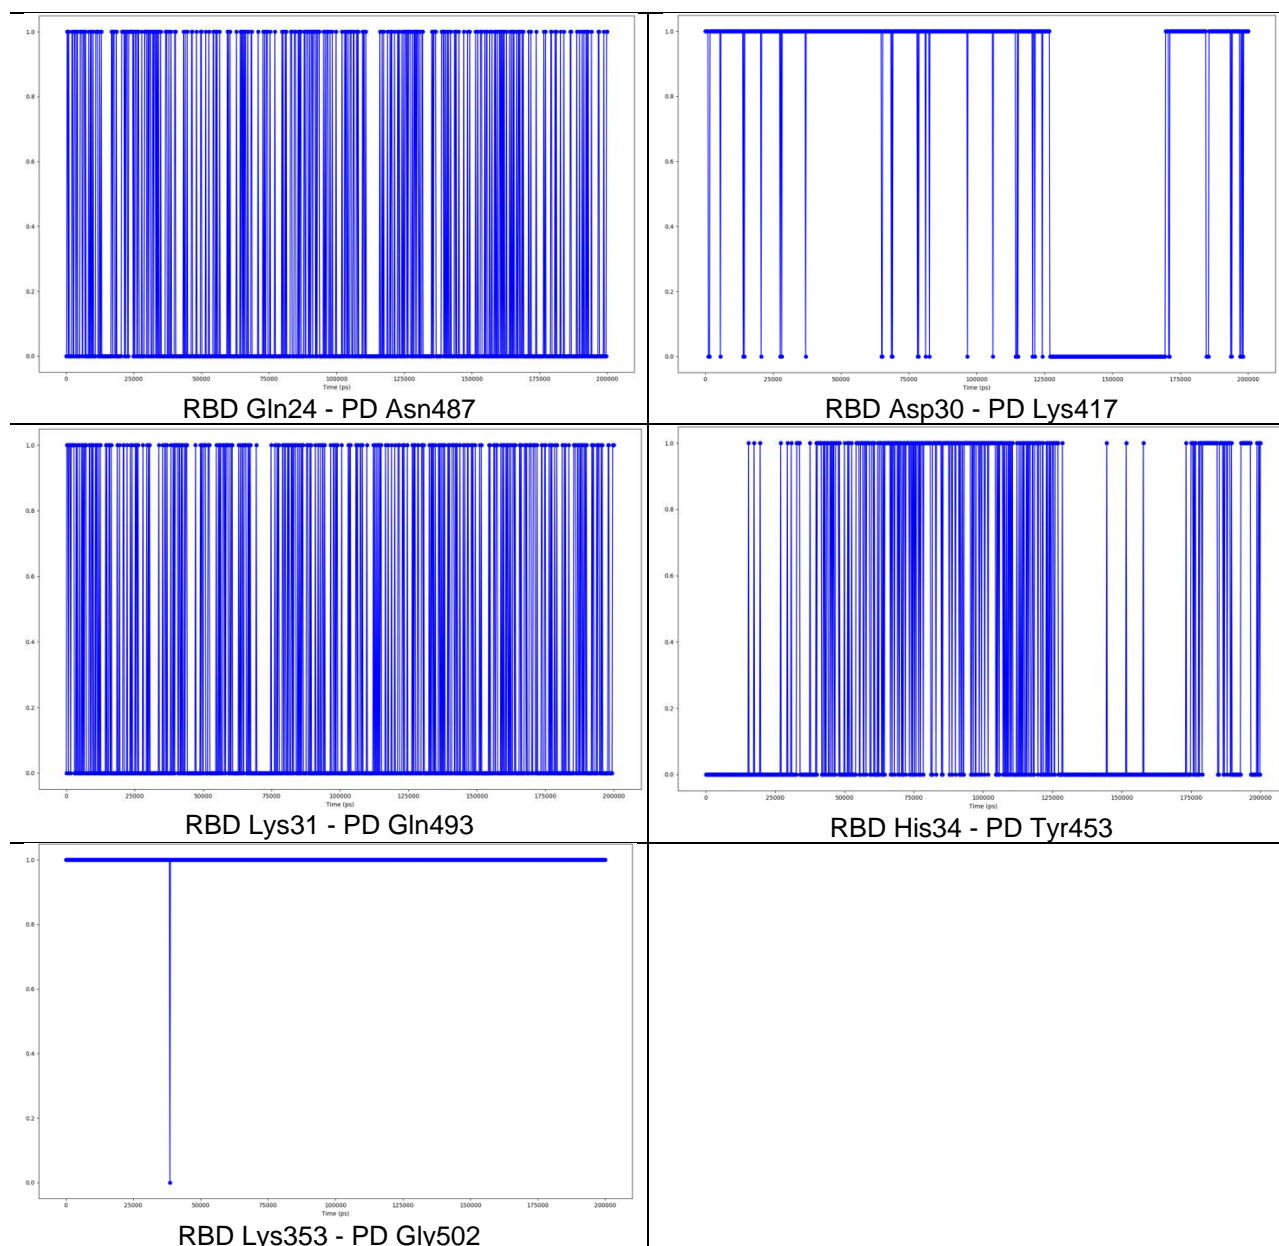

**Table S5. Phyco-chemical information of consensus molecules.** The table provides information about the compounds retrieved from docking and pharmacophore screenings performed on Spike RBD N-terminal region.

| Consensus molecule                                                                                       | MW      | cLogP <sup>[a]</sup> | PSA <sup>[a]</sup> | Rule of five violations | $\Delta G_{\text{binding}}^{\text{[b]}}$ | Docking score <sup>[a]</sup> | Pharmacophore-fit score <sup>[a]</sup> |
|----------------------------------------------------------------------------------------------------------|---------|----------------------|--------------------|-------------------------|------------------------------------------|------------------------------|----------------------------------------|
| 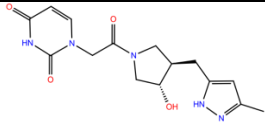<br><b>Spike_RM01</b> | 333.346 | -0.554               | 153.327            | 0                       | -44.653                                  | -5.318                       | 58.730                                 |

|                                                                                                              |         |        |         |   |         |        |        |
|--------------------------------------------------------------------------------------------------------------|---------|--------|---------|---|---------|--------|--------|
| 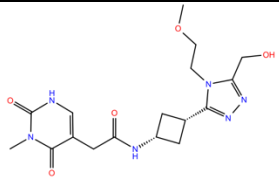 <p><b>Spike_RM02</b></p>   | 392.414 | -0.237 | 170.248 | 1 | -48.039 | -4.460 | 58.580 |
|  <p><b>Spike_RM03</b></p>   | 360.412 | 1.224  | 116.340 | 0 | -58.259 | -5.036 | 58.640 |
|  <p><b>Spike_RM04</b></p>   | 309.367 | -1.066 | 109.749 | 0 | -43.861 | -5.042 | 57.410 |
|  <p><b>Spike_RM05</b></p>   | 324.186 | -2.569 | 201.174 | 2 | -36.930 | -6.836 | 58.290 |
|  <p><b>Spike_RM06</b></p>  | 284.317 | 0.737  | 99.295  | 0 | -41.534 | -5.562 | 56.110 |
|  <p><b>Spike_RM07</b></p> | 316.359 | 2.177  | 99.412  | 0 | -44.845 | -4.381 | 56.240 |
|  <p><b>Spike_RM08</b></p> | 343.385 | 0.027  | 124.934 | 0 | -43.589 | -4.290 | 58.700 |
|  <p><b>Spike_RM09</b></p> | 352.435 | 1.920  | 93.900  | 0 | -49.420 | -4.935 | 57.650 |
|  <p><b>Spike_RM10</b></p> | 349.388 | 2.717  | 97.396  | 0 | -48.692 | -4.690 | 55.830 |
|  <p><b>Spike_RM11</b></p> | 423.430 | 1.060  | 176.119 | 1 | -46.155 | -5.676 | 66.590 |



|                                                                                                              |         |        |         |   |         |        |        |
|--------------------------------------------------------------------------------------------------------------|---------|--------|---------|---|---------|--------|--------|
| 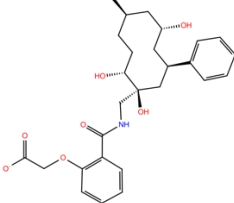 <p><b>Spike_RM12</b></p>   | 485.576 | 3.518  | 134.235 | 0 | -34.966 | -4.281 | 58.070 |
|  <p><b>Spike_RM13</b></p>   | 399.449 | 1.159  | 142.345 | 0 | -41.774 | -4.894 | 57.430 |
|  <p><b>Spike_RM14</b></p>   | 462.504 | 2.397  | 152.169 | 0 | -56.750 | -5.320 | 57.600 |
|  <p><b>Spike_RM15</b></p>   | 447.493 | 1.987  | 140.299 | 0 | -53.986 | -4.834 | 57.040 |
|  <p><b>Spike_RM16</b></p> | 463.492 | 1.894  | 155.876 | 0 | -49.348 | -5.003 | 57.260 |
|  <p><b>Spike_RM17</b></p> | 287.318 | 1.669  | 102.195 | 0 | -42.492 | -4.944 | 57.950 |
|  <p><b>Spike_RM18</b></p> | 391.472 | 2.600  | 86.270  | 0 | -46.844 | -4.568 | 57.670 |
|  <p><b>Spike_RM19</b></p> | 334.377 | 3.323  | 70.653  | 0 | -44.880 | -4.897 | 57.050 |
|  <p><b>Spike_RM20</b></p> | 367.425 | 2.704  | 100.627 | 0 | -47.562 | -4.494 | 56.300 |
|  <p><b>Spike_RM21</b></p> | 337.393 | -0.002 | 132.701 | 0 | -35.847 | -5.296 | 65.190 |

|                                                                                                              |         |        |         |   |         |        |        |
|--------------------------------------------------------------------------------------------------------------|---------|--------|---------|---|---------|--------|--------|
| 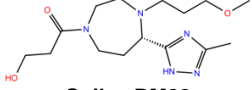 <p><b>Spike_RM22</b></p>   | 325.410 | -0.027 | 99.560  | 0 | -52.666 | -5.164 | 58.490 |
|  <p><b>Spike_RM23</b></p>   | 342.372 | 1.291  | 98.253  | 0 | -45.305 | -4.722 | 56.150 |
|  <p><b>Spike_RM24</b></p>   | 347.376 | 2.676  | 106.796 | 0 | -48.338 | -5.290 | 56.090 |
|  <p><b>Spike_RM25</b></p>   | 396.411 | 3.170  | 99.040  | 0 | -51.707 | -4.996 | 56.300 |
|  <p><b>Spike_RM26</b></p>  | 369.376 | 2.247  | 125.321 | 0 | -48.653 | -4.958 | 55.910 |
|  <p><b>Spike_RM27</b></p> | 327.385 | 1.176  | 112.532 | 0 | -41.896 | -4.100 | 55.870 |
|  <p><b>Spike_RM28</b></p> | 373.457 | 0.891  | 114.365 | 0 | -52.603 | -5.720 | 65.860 |
|  <p><b>Spike_RM29</b></p> | 369.395 | 2.229  | 113.967 | 0 | -50.333 | -5.224 | 55.330 |
|  <p><b>Spike_RM30</b></p> | 429.425 | 1.171  | 157.547 | 0 | -51.658 | -4.842 | 56.210 |
|  <p><b>Spike_RM31</b></p> | 334.377 | 3.672  | 67.779  | 0 | -42.773 | -4.987 | 56.780 |

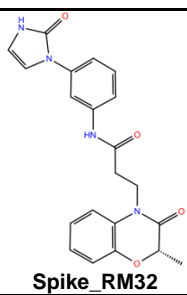

392.413

2.555

116.506

0

-49.262

-4.854

56.190

<sup>[a]</sup> Property computationally calculated; <sup>[b]</sup> Property computationally calculated as MM-GBSA.
